# Supplementary material for: Gut Microbiota and Biomarkers of Endothelial Dysfunction in Cirrhosis
Source: MDPI journal article supplement (doi:10.3390/ijms25041988), 2024-02-06
Supplement: s1 [file s1]

**Supplementary Table S1.** Characteristics of patients with cirrhosis

|                                                         |                 |
|---------------------------------------------------------|-----------------|
| Age, years                                              | 49[44-56]       |
| Body mass index, kg/m <sup>2</sup>                      | 26.1[24.5-30.0] |
| Male/female                                             | 18/29           |
| Etiology of cirrhosis: alcohol                          | 23 (48.9%)      |
| HBV                                                     | 3 (6.4%)        |
| HCV                                                     | 8 (17.0%)       |
| metabolic-associated fatty liver disease                | 3 (6.4%)        |
| mixed                                                   | 7 (14.9%)       |
| cryptogenic                                             | 3 (6.4%)        |
| Child-Pugh score                                        | 9[7-10]         |
| End-diastolic volume of the left ventricle, mL          | 98[88-109]      |
| Ejection fraction of the left ventricle, %              | 60[59-63]       |
| Stroke volume, mL                                       | 59[55-66]       |
| Heart rate, bpm                                         | 72[68-78]       |
| Cardiac output, L/min                                   | 4.4[4.0-5.2]    |
| Mean blood pressure, mmHg                               | 87[80-93]       |
| Systemic vascular resistance, dyn·s·cm <sup>-5</sup>    | 1524[1302-1808] |
| Mean pulmonary artery pressure, mmHg                    | 23[21-26]       |
| Esophageal varices (Grade 1), n (%)                     | 15 (31.9%)      |
| Esophageal varices (Grade 2-3), n (%)                   | 27 (57.4%)      |
| Minimal hepatic encephalopathy, n (%)                   | 32 (68.1%)      |
| Overt hepatic encephalopathy, n (%)                     | 4 (8.5%)        |
| Ascites, n (%)                                          | 33 (70.2%)      |
| Ascites (Grade 1), n (%)                                | 22 (46.8%)      |
| Ascites (Grade 2-3), n (%)                              | 11 (23.4%)      |
| Serum total protein, g/L                                | 72.5[66.6-76.1] |
| Serum albumin, g/L                                      | 35.0[31.8-38.0] |
| Hypoalbuminemia (serum albumin < 35 g/L), n (%)         | 23 (48.9%)      |
| Serum total bilirubin, μmol/L                           | 45.3[29.2-64.5] |
| Hyperbilirubinemia (total bilirubin > 34 μmol/L), n (%) | 32 (68.1%)      |
| International normalized ratio (INR)                    | 1.5[1.38-1.69]  |
| Hypocoagulation (INR > 1.7), n (%)                      | 10 (21.3%)      |
| Fibrinogen, g/L                                         | 2.2[1.6-2.7]    |
| Serum cholesterol, mmol/L                               | 4.3[3.1-5.1]    |
| Serum creatinine, mg/dL                                 | 74[66-97]       |
| Serum sodium, mmol/L                                    | 141[140-142]    |
| Serum potassium, mmol/L                                 | 4.3[4.0-4.8]    |
| Serum glucose, mmol/L                                   | 4.8[4.3-5.5]    |
| Alanine aminotransferase, U/L                           | 31[21-44]       |
| Aspartate aminotransferase, U/L                         | 49[36-69]       |
| Gamma glutamyl transferase, U/L                         | 86[49-126]      |
| Alkaline phosphatase, U/L                               | 242[194-315]    |
| C-reactive protein, mg/L                                | 7[3-13]         |
| Splenic length, cm                                      | 15.0[13.4-17.0] |
